# Supplementary material for: Dimerization-based control of cooperativity
Source: Royal Society of Chemistry journal article supplement (doi:10.1039/c4mb00022f), 2014-04-07
Supplement: c4mb00022f1.pdf [file c4mb00022f1.pdf]

## **Dimerization-based Control of Cooperativity**

Mehdi Bouhaddou and Marc R. Birtwistle<sup>#</sup>

Icahn School of Medicine at Mount Sinai, Department of Pharmacology and Systems Therapeutics, New York, NY 10029, USA

<sup>#</sup>Corresponding author: marc.birtwistle@mssm.edu

## **Supplementary Information**

### **Table of Contents**

- 1. Supplementary Figure 1: The effect of dimerization on cooperativity behavior for a bivalent-ligand interacting with a homodimer or heterodimer receptor**
- 2. Supplementary Figure 2: Effect of dimerization affinity on cooperativity behavior using simulations that satisfy detailed balance.**
- 3. Supplementary Figure 3: Relationship between stoichiometrically asymmetric dimer accumulation and cooperativity using simulations that satisfy detailed balance.**
- 4. Supplementary Figure 4: For functional analyses, the Hill equation is fit to the first portion of the dose-response curve.**
- 5. Supplementary Table 1: The ordinary differential equations for the model depicted in Figure 1A.**
- 6. Supplementary Table 2: The ordinary differential equations for the model depicted in Figure 1B.**
- 7. Supplementary Table 3: The ordinary differential equations for the model depicted in Figure 1C.**
- 8. Supplementary Table 4: The ordinary differential equations for the bivalent-ligand interacting with homodimer receptors model depicted in Figure S1B-C.**
- 9. Supplementary Table 5: The ordinary differential equations for the bivalent-ligand interacting with heterodimer receptors model depicted in Figure S1D-E.**

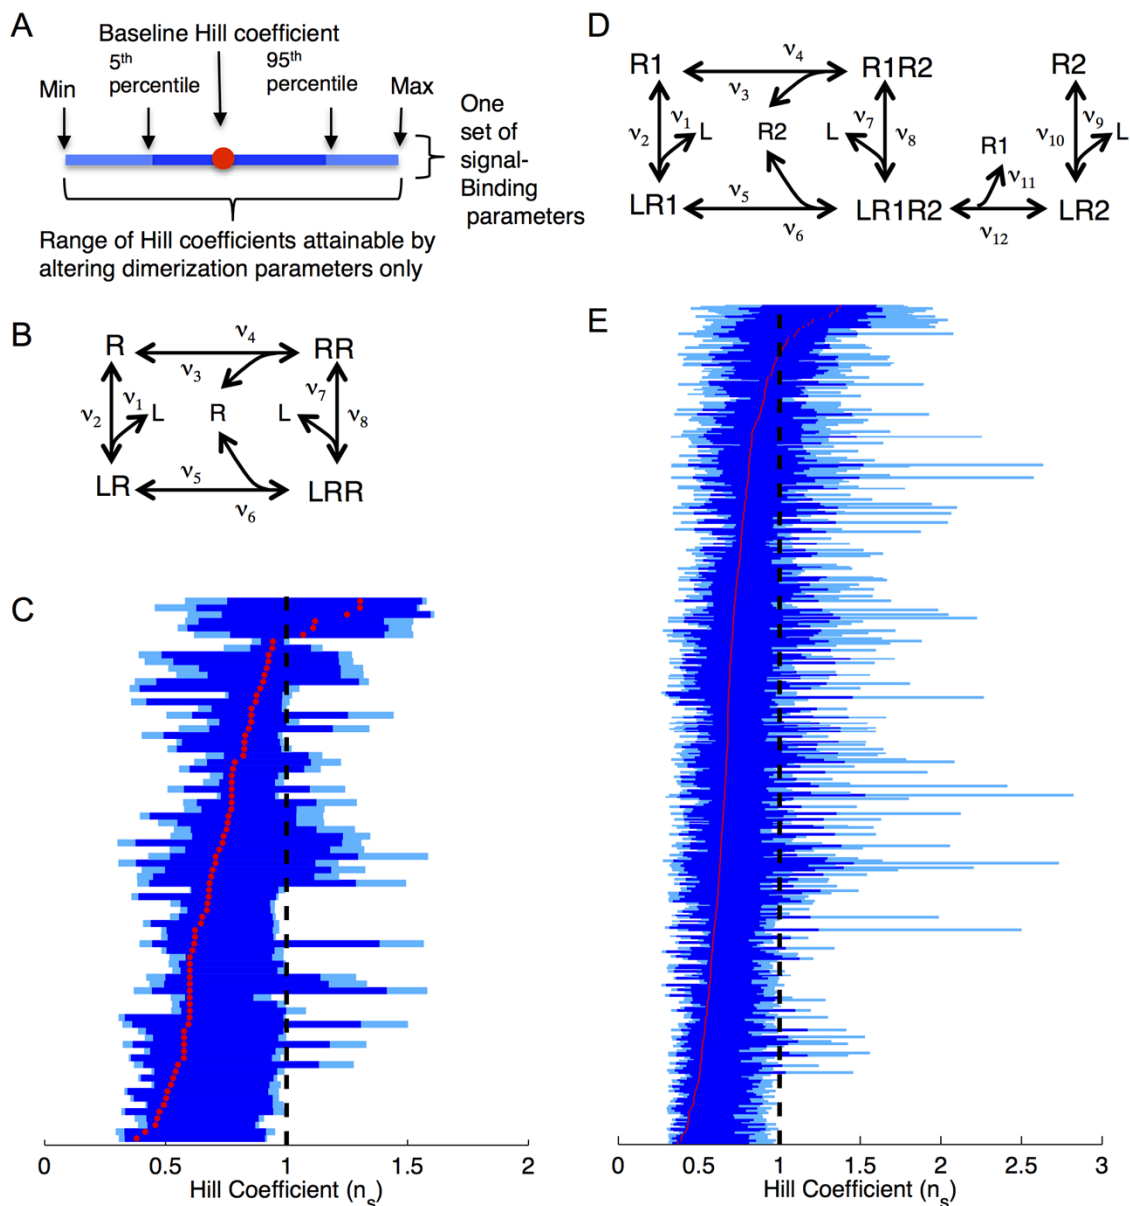

**Figure S1. The effect of dimerization on cooperativity behavior for a bivalent-ligand interacting with a homodimer or heterodimer receptor.**

(A) Graphical description of each horizontal bar (in C and E). Each horizontal bar corresponds to 3<sup>4</sup> (in C) or 3<sup>6</sup> (in E) simulations and spans the range of Hill coefficients attainable by altering dimerization rate constants (to 0.1, 1, or 10 s<sup>-1</sup> or nM<sup>-1</sup>s<sup>-1</sup>) while keeping signal binding rate constants fixed. The dark blue section of each bar denotes Hill coefficients between the 5<sup>th</sup> and 95<sup>th</sup> percentiles and the light blue tips span the remaining 5% on either side. Each bar contains a single red dot, indicating the “baseline” Hill coefficient when all dimerization rate constants are set to unity. (B) Kinetic scheme for bivalent-ligand interacting with a homodimer receptor. (C) Results for model shown in B, displaying Scatchard  $n_s$  Hill coefficients. (D) Kinetic scheme for bivalent-ligand interacting with a heterodimer receptor. (E) Results for model shown in D, displaying Scatchard  $n_s$  Hill coefficients.

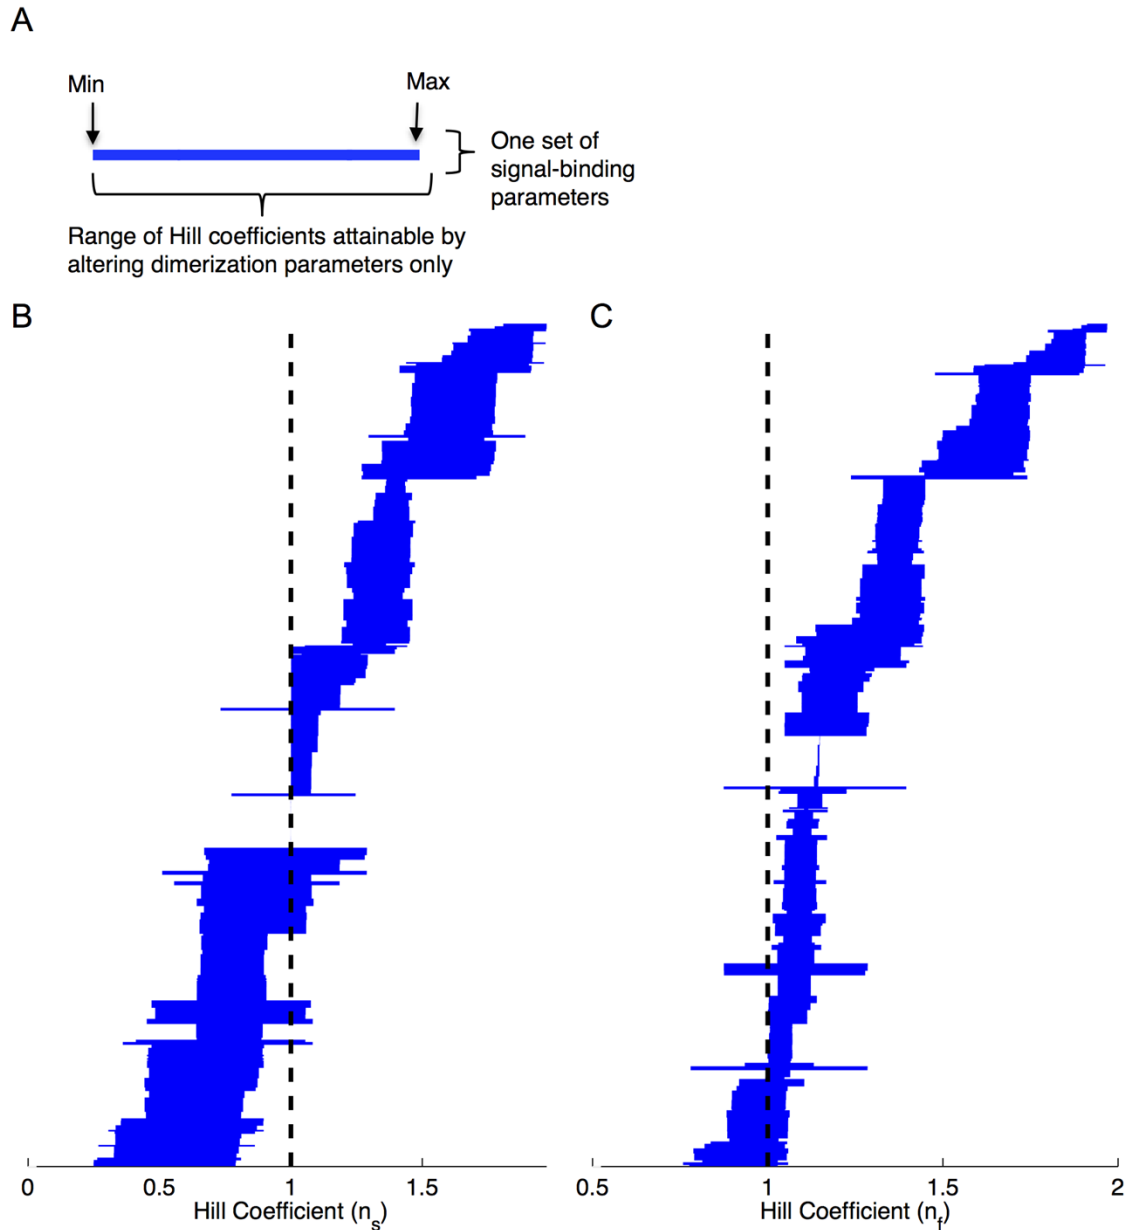

**Figure S2. Effect of dimerization affinity on cooperativity behavior using simulations that satisfy detailed balance.**

(A) Graphical description of each horizontal bar (in B and C). Each horizontal bar comprises  $3^6$  (729) simulations that satisfy detailed balance (see Methods for more info) and spans the range of Hill coefficients attainable by altering dimerization rate constants while keeping signal-binding rate constants fixed. The bar extends from the minimum to the maximum Hill coefficient for each set. (B) Results for Scatchard Hill coefficients ( $n_s$ ). (C) Results for functional Hill coefficients ( $n_f$ ). Sets are sorted according to the midpoint between the minimum and maximum Hill coefficients.

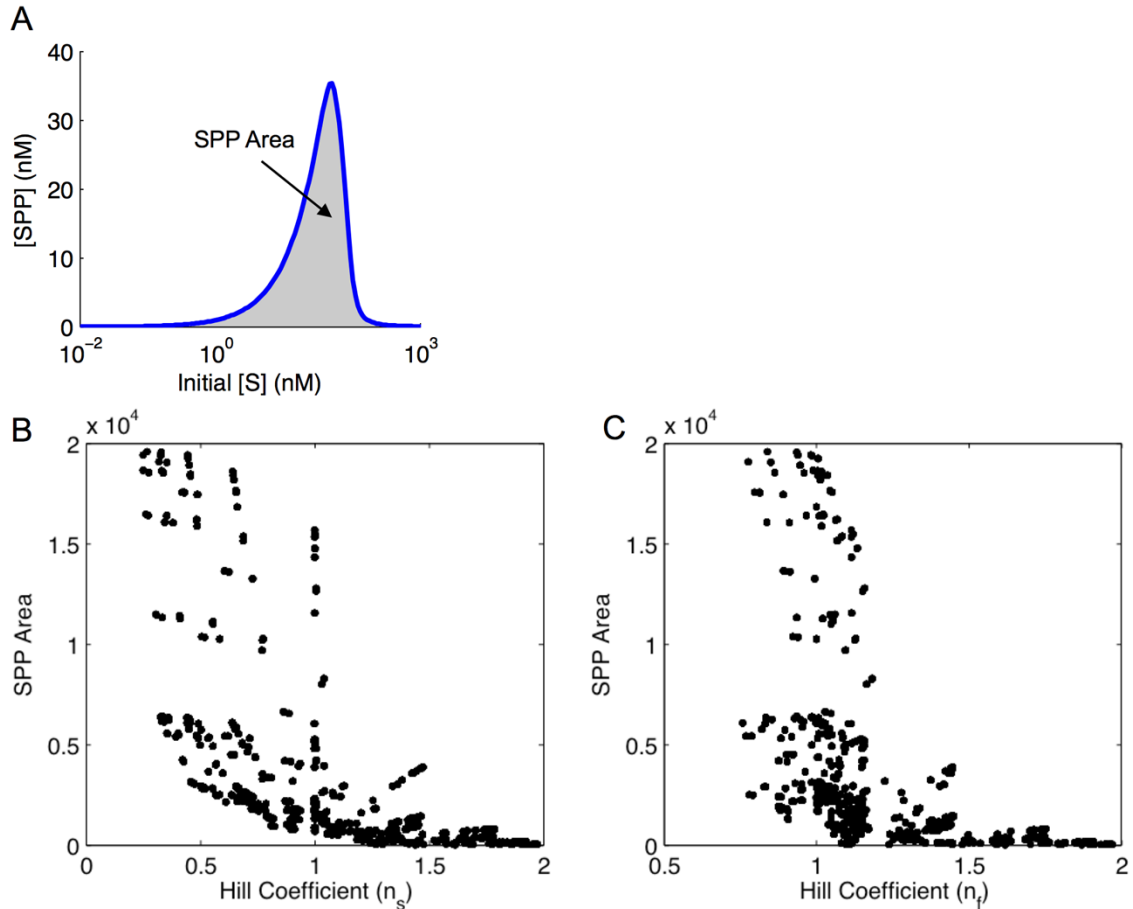

**Figure S3. Relationship between stoichiometrically asymmetric dimer accumulation and cooperativity using simulations that satisfy detailed balance.**

(A) An example of how “SPP area” (shaded region) is calculated. (B) Scatterplot showing the correlation between Scatchard Hill coefficients ( $n_s$ ) and their corresponding SPP areas for each of the  $3^{12}$  (531,441) simulations that satisfy detailed balance (see Methods for more info). The correlation is highly significant ( $\rho=-0.62$ ,  $p<0.001$ ). (C) Scatterplot showing the correlation between functional Hill coefficients ( $n_f$ ) and their corresponding SPP areas for each of the  $3^{12}$  simulations that satisfy detailed balance. The correlation is highly significant ( $\rho=-0.47$ ,  $p<0.001$ ).

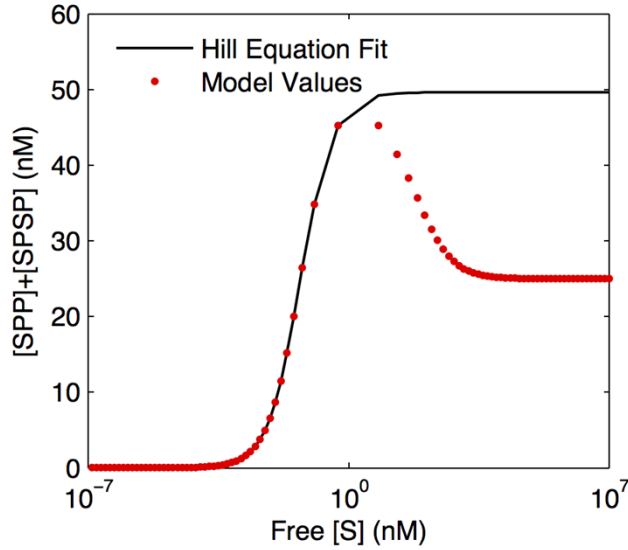

**Figure S4.** For functional analyses, the Hill equation is fit to the first portion of the dose-response curve.

Model-simulated values are depicted in red dots. The Hill equation fit to the model output is shown with a solid black line. The fit, and the resulting functional Hill coefficient, is calculated using only values prior to the maximum of the model-simulated dose-response curve.

**Supplementary Table S1. The ordinary differential equations for the model depicted in Figure 1A.**

$$\frac{d[S]}{dt} = k_1[SP] + k_7[SPP] + 2 \cdot k_9[SPSP] - k_2[S][P] - 2 \cdot k_8[S][PP] - k_{10}[SPP][S]$$

$$\frac{d[P]}{dt} = k_1[SP] + 2 \cdot k_3[PP] + k_5[SPP] - k_2[S][P] - 2 \cdot k_4[P]^2 - k_6[SP][P]$$

$$\frac{d[SP]}{dt} = k_2[S][P] + k_5[SPP] + 2 \cdot k_{11}[SPSP] - k_1[SP] - k_6[SP][P] - 2 \cdot k_{12}[SP]^2$$

$$\frac{d[SPSP]}{dt} = k_{10}[SPP][S] + k_{12}[SP]^2 - 2 \cdot k_9[SPSP] - k_{11}[SPSP]$$

$$\frac{d[PP]}{dt} = k_4[P]^2 + k_7[SPP] - k_3[PP] - 2 \cdot k_8[S][PP]$$

$$\frac{d[SPP]}{dt} = k_6[SP][P] + 2 \cdot k_8[S][PP] + 2 \cdot k_9[SPSP] - k_5[SPP] - k_7[SPP] - k_{10}[SPP][S]$$

**Supplementary Table S2. The ordinary differential equations for the model depicted in Figure 1B.**

$$\begin{aligned}\frac{d[S]}{dt} &= k_1[SP] - k_2[S][P] \\ \frac{d[P]}{dt} &= k_1[SP] + k_5[SPP] - k_2[S][P] - k_6[SP][P] \\ \frac{d[SP]}{dt} &= k_2[S][P] + k_5[SPP] - k_1[SP] - k_6[SP][P] \\ \frac{d[SPP]}{dt} &= k_6[SP][P] - k_5[SPP]\end{aligned}$$

**Supplementary Table S3. The ordinary differential equations for the model depicted in Figure 1C.**

$$\begin{aligned}\frac{d[S]}{dt} &= k_1[SP] - k_2[S][P] \\ \frac{d[P]}{dt} &= k_1[SP] - k_2[S][P] \\ \frac{d[SP]}{dt} &= k_2[S][P] + 2 \cdot k_{11}[SPSP] - k_1[SP] - 2 \cdot k_{12}[SP]^2 \\ \frac{d[SPSP]}{dt} &= k_{12}[SP]^2 - k_{11}[SPSP]\end{aligned}$$

**Supplementary Table S4. The ordinary differential equations for the bivalent-ligand interacting with homodimer receptors model depicted in Figure S1B-C.**

$$\begin{aligned}\frac{d[L]}{dt} &= k_1[LR] + k_7[LRR] - k_2[L][R] - k_8[L][RR] \\ \frac{d[R]}{dt} &= k_1[LR] + 2 \cdot k_3[RR] + k_5[LRR] - k_2[L][R] - 2 \cdot k_4[R]^2 - k_6[LR][R] \\ \frac{d[LR]}{dt} &= k_2[L][R] + k_5[LRR] - k_1[LR] - k_6[LR][R] \\ \frac{d[RR]}{dt} &= k_4[R]^2 + k_7[LRR] - k_3[RR] - k_8[L][RR] \\ \frac{d[LRR]}{dt} &= k_6[LR][R] + k_8[L][RR] - k_5[LRR] - k_7[LRR]\end{aligned}$$

**Supplementary Table S5. The ordinary differential equations for the bivalent-ligand interacting with heterodimer receptors model depicted in Figure S1D-E.**

$$\frac{d[L]}{dt} = k_1[LR_1] + k_7[LR_1R_2] + k_9[LR_2] - k_2[L][R_1] - k_8[L][R_1R_2] - k_{10}[L][R_2]$$

$$\frac{d[R_1]}{dt} = k_1[LR_1] + k_3[R_1R_2] + k_{11}[LR_1R_2] - k_2[L][R_1] - k_4[R_1][R_2] - k_{12}[LR_2][R_1]$$

$$\frac{d[R_2]}{dt} = k_3[R_1R_2] + k_5[LR_1R_2] + k_9[LR_2] - k_4[R_1][R_2] - k_6[LR_1][R_2] - k_{10}[L][R_2]$$

$$\frac{d[LR_1]}{dt} = k_2[L][R_1] + k_5[LR_1R_2] - k_1[LR_1] - k_6[LR_1][R_2]$$

$$\frac{d[LR_2]}{dt} = k_{10}[L][R_2] + k_{11}[LR_1R_2] - k_9[LR_2] - k_{12}[LR_2][R_1]$$

$$\frac{d[LR_1R_2]}{dt} = k_6[LR_1][R_2] + k_8[L][R_1R_2] + k_{12}[LR_2][R_1] - k_5[LR_1R_2] - k_7[LR_1R_2] - k_{11}[LR_1R_2]$$

$$\frac{d[R_1R_2]}{dt} = k_4[R_1][R_2] + k_7[LR_1R_2] - k_3[R_1R_2] - k_8[L][R_1R_2]$$
